# Supplementary material
Source: PubMed Central journal article supplement (PMC1201625)
Supplement: pnas_0506583102_6.pdf [file pnas_0506583102_6.pdf]

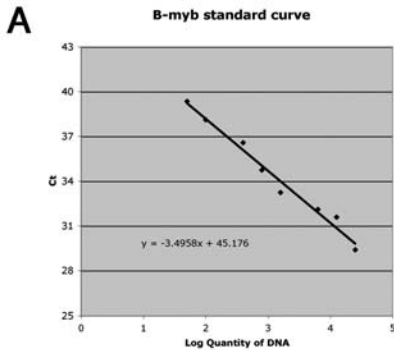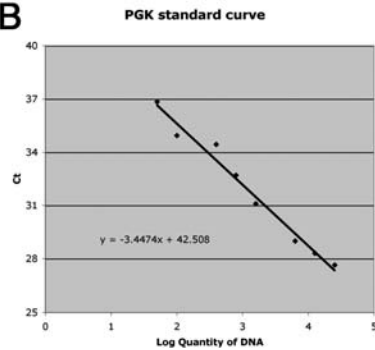

**C**

|               | Tumor tissue |        |                    |                  |                 | Wild-type tissue |        |                    |                  |                 |
|---------------|--------------|--------|--------------------|------------------|-----------------|------------------|--------|--------------------|------------------|-----------------|
|               | B-myb Ct     | PGK Ct | B-myb DNA quantity | PGK DNA quantity | B-myb/PGK ratio | B-myb Ct         | PGK Ct | B-myb DNA quantity | PGK DNA quantity | B-myb/PGK ratio |
| tumor fish 1  | 32.49        | 31.83  | 3.63               | 3.10             | 1.17            | 31.32            | 30.95  | 3.96               | 3.35             | 1.18            |
| tumor fish 2  | 30.88        | 30.43  | 4.09               | 3.50             | 1.17            | 28.56            | 28.09  | 4.75               | 4.18             | 1.14            |
| tumor fish 3  | 33.88        | 32.30  | 3.23               | 2.96             | 1.09            | 32.89            | 30.53  | 3.51               | 3.48             | 1.01            |
| tumor fish 4  | 33.79        | 36.39  | 3.26               | 1.78             | 1.83            | 32.81            | 34.18  | 3.54               | 2.42             | 1.46            |
| tumor fish 5  | 31.37        | 30.89  | 3.95               | 3.37             | 1.17            | 30.95            | 30.61  | 4.07               | 3.45             | 1.18            |
| tumor fish 6  | 32.28        | 29.86  | 3.69               | 3.67             | 1.01            | 32.22            | 30.85  | 3.71               | 3.38             | 1.10            |
| tumor fish 7  | 39.71        | 35.31  | 1.56               | 2.09             | 0.75            | 35.37            | 32.99  | 2.81               | 2.76             | 1.02            |
| tumor fish 8  | 33.52        | 33.22  | 3.34               | 2.69             | 1.24            | 31.64            | 30.38  | 3.87               | 3.52             | 1.10            |
| tumor fish 9  | 32.15        | 32.00  | 3.73               | 3.05             | 1.22            | 31.66            | 31.76  | 3.87               | 3.12             | 1.24            |
| tumor fish 10 | 33.23        | 31.03  | 3.42               | 3.33             | 1.03            | 32.41            | 29.77  | 3.65               | 3.70             | 0.99            |
| tumor fish 11 | 33.20        | 32.74  | 3.43               | 2.83             | 1.21            | 34.22            | 32.83  | 3.14               | 2.81             | 1.12            |
| tumor fish 12 | 31.54        | 30.64  | 3.90               | 3.44             | 1.13            | 30.67            | 28.93  | 4.15               | 3.94             | 1.05            |
| tumor fish 13 | 35.60        | 33.61  | 2.74               | 2.58             | 1.06            | 29.51            | 27.40  | 4.48               | 4.38             | 1.02            |
| tumor fish 14 | 32.00        | 30.43  | 3.77               | 3.50             | 1.08            | 32.21            | 29.54  | 3.71               | 3.76             | 0.99            |
| tumor fish 15 | 36.14        | 32.93  | 2.59               | 2.78             | 0.93            | 32.78            | 29.41  | 3.55               | 3.80             | 0.93            |
| tumor fish 16 | 32.60        | 32.09  | 3.60               | 3.02             | 1.19            | 31.33            | 29.19  | 3.96               | 3.86             | 1.03            |
| tumor fish 17 | 34.08        | 31.89  | 3.18               | 3.08             | 1.03            | 30.84            | 30.11  | 4.10               | 3.60             | 1.14            |

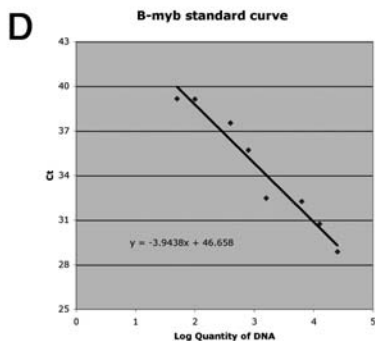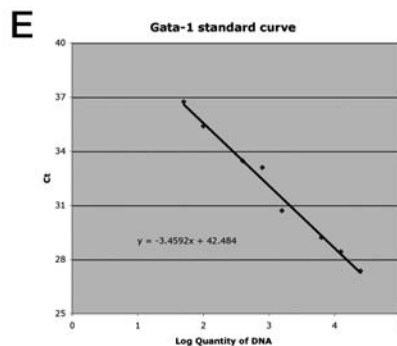

**F**

|               | Tumor tissue |          |                    |                    |                  | Wild-type tissue |          |                    |                    |                  |
|---------------|--------------|----------|--------------------|--------------------|------------------|------------------|----------|--------------------|--------------------|------------------|
|               | B-myb Ct     | Gata1 Ct | B-myb DNA quantity | Gata1 DNA quantity | B-myb/Gata ratio | B-myb Ct         | Gata1 Ct | B-myb DNA quantity | Gata1 DNA quantity | B-myb/Gata ratio |
| tumor fish 1  | 32.68        | 30.85    | 3.54               | 3.36               | 1.05             | 32.11            | 30.64    | 3.69               | 3.42               | 1.08             |
| tumor fish 2  | 31.73        | 30.50    | 3.79               | 3.46               | 1.09             | 28.91            | 27.73    | 4.50               | 4.27               | 1.06             |
| tumor fish 3  | 34.06        | 32.06    | 3.20               | 3.01               | 1.06             | 32.46            | 30.73    | 3.60               | 3.40               | 1.06             |
| tumor fish 4  | 33.52        | 34.22    | 3.33               | 2.39               | 1.39             | 32.51            | 32.64    | 3.59               | 2.85               | 1.26             |
| tumor fish 5  | 31.85        | 31.55    | 3.75               | 3.16               | 1.19             | 30.81            | 30.33    | 4.02               | 3.51               | 1.14             |
| tumor fish 6  | 32.68        | 30.34    | 3.54               | 3.51               | 1.01             | 33.31            | 31.33    | 3.38               | 3.22               | 1.05             |
| tumor fish 7  | 35.99        | 33.85    | 2.71               | 2.55               | 1.06             | 34.66            | 31.34    | 3.04               | 3.22               | 0.94             |
| tumor fish 8  | 32.93        | 32.00    | 3.48               | 3.03               | 1.15             | 31.41            | 30.18    | 3.87               | 3.56               | 1.09             |
| tumor fish 9  | 33.13        | 30.89    | 3.43               | 3.35               | 1.02             | 31.28            | 29.71    | 3.90               | 3.69               | 1.06             |
| tumor fish 10 | 33.35        | 31.34    | 3.37               | 3.22               | 1.05             | 32.48            | 31.13    | 3.60               | 3.28               | 1.10             |
| tumor fish 11 | 33.86        | 32.61    | 3.25               | 2.85               | 1.14             | 34.08            | 32.16    | 3.19               | 2.99               | 1.07             |
| tumor fish 12 | 31.51        | 31.45    | 3.84               | 3.19               | 1.20             | 30.52            | 29.54    | 4.09               | 3.74               | 1.09             |
| tumor fish 13 | 35.59        | 34.05    | 2.81               | 2.44               | 1.15             | 28.86            | 27.33    | 4.51               | 4.38               | 1.03             |
| tumor fish 14 | 31.83        | 31.09    | 3.76               | 3.29               | 1.14             | 32.26            | 30.58    | 3.65               | 3.44               | 1.06             |
| tumor fish 15 | 35.19        | 33.83    | 2.91               | 2.50               | 1.16             | 32.41            | 31.22    | 3.61               | 3.26               | 1.11             |
| tumor fish 16 | 32.39        | 31.93    | 3.62               | 3.05               | 1.19             | 31.16            | 28.87    | 3.93               | 3.94               | 1.00             |
| tumor fish 17 | 33.57        | 32.20    | 3.32               | 2.97               | 1.12             | 30.64            | 30.21    | 4.06               | 3.55               | 1.14             |
