# Supplementary material
Source: PubMed Central journal article supplement (PMC1201625)
Supplement: pnas_0506583102_8.pdf [file pnas_0506583102_8.pdf]

**Table 3. Probing of 14 microarray data sets of human cancer with the B-myb signature by using the Gene Set Enrichment Analysis method**

| Phenotype                                              | Enrichment Score | Normalized Enrichment | PValue       |
|--------------------------------------------------------|------------------|-----------------------|--------------|
| <b>Lung p53+ (Beer et al)</b>                          | <b>0.3272</b>    | <b>2.7593</b>         | <b>0.007</b> |
| Lymph Node Metastatic Gastric (Chen et al)             | 0.2477           | 2.6738                | 0.007        |
| Recurrent Hepatic Carcinoma (Yamaguchi et al)          | 0.2406           | 1.5807                | 0.073        |
| Acute Lymphoblastic Leukemia (Golub et al)             | 0.2347           | 0.9742                | 0.158        |
| Poor Outcome Medulloblastoma et al)                    | 0.2076           | 0.7808                | 0.224        |
| Metastatic Medulloblastoma et al)                      | 0.2458           | 0.6022                | 0.271        |
| Recurrent Prostate Cancer (Febbo et al)                | 0.1803           | 0.5889                | 0.286        |
| Poor Outcome Lung Adenocarcinoma (Beer et al)          | 0.1898           | 0.3833                | 0.316        |
| Good Outcome Lung Adenocarcinoma (Beer et al)          | 0.1862           | 0.249                 | 0.325        |
| Good Outcome Lymphoma (Monti et al)                    | 0.1990           | 0.3555                | 0.344        |
| Poor Outcome Glioma (Nutt et al)                       | 0.1681           | 0.275                 | 0.387        |
| Anaplastic Oligodendroglioma (Nutt et al)              | 0.1827           | 0.1648                | 0.394        |
| Metastatic Tumors et al)                               | 0.1662           | 0.1557                | 0.394        |
| Poor Outcome Lung Cancer (Banerjee et al)              | 0.1721           | 0.2549                | 0.419        |
| Nonrecurrent Prostate Cancer Febbo et al)              | 0.1678           | 0.2348                | 0.442        |
| Recurrent Breast Cancer (unpublished)                  | 0.1603           | 0.005                 | 0.448        |
| Good Outcome Lung Cancer (Banerjee et al)              | 0.1605           | 0.0502                | 0.485        |
| Classic Glioblastoma (Nutt et al)                      | 0.1605           | 0.3952                | 0.612        |
| Good Outcome Glioblastoma (Nutt et al)                 | 0.1321           | 0.5374                | 0.691        |
| Poor Outcome Lymphoma (Monti et al)                    | 0.1484           | 0.6732                | 0.743        |
| Nonrecurrent Breast Cancer (unpublished)               | 0.1361           | 0.7377                | 0.749        |
| Lung p53- (Beer et al)                                 | 0.1473           | 0.7918                | 0.760        |
| Nonmetastatic Medulloblastoma (McDonald et al)         | 0.1549           | 0.8469                | 0.799        |
| Nonmetastatic Tumors (Ramawamy et al)                  | 0.1284           | 0.9752                | 0.839        |
| Primary Tumor Site Gastric Adenocarcinoma (Chen et al) | 0.1158           | 1.3156                | 0.911        |
| Nonrecurrent Hepatic Carcinoma et al)                  | 0.1124           | 1.3768                | 0.928        |
| Acute Myeloid Leukemia Golub et al)                    | 0.1233           | 1.4455                | 0.958        |

A statistically significant association between the B-myb signature and p53 status was found in a set of 85 human lung adenocarcinomas.
