# Supplementary material
Source: PubMed Central journal article supplement (PMC1201625)

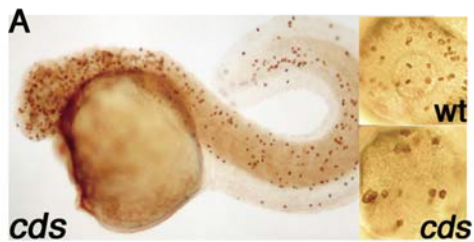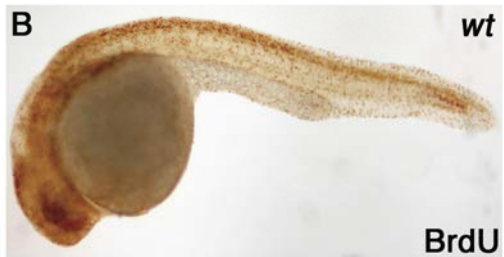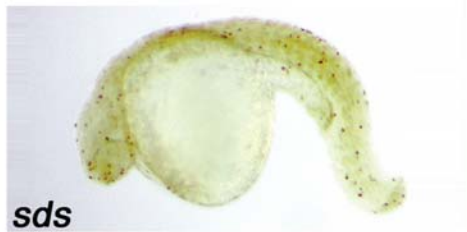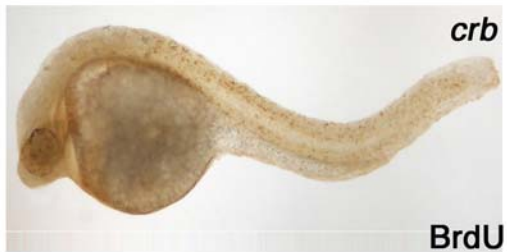

Supplement: pnas_0506583102_1.pdf [file pnas_0506583102_1.pdf]

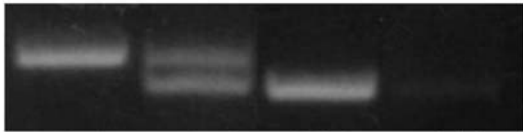

*crb-/-*

*crb+/-*

*WT*

*-RT*

Supplement: pnas_0506583102_2.pdf [file pnas_0506583102_2.pdf]

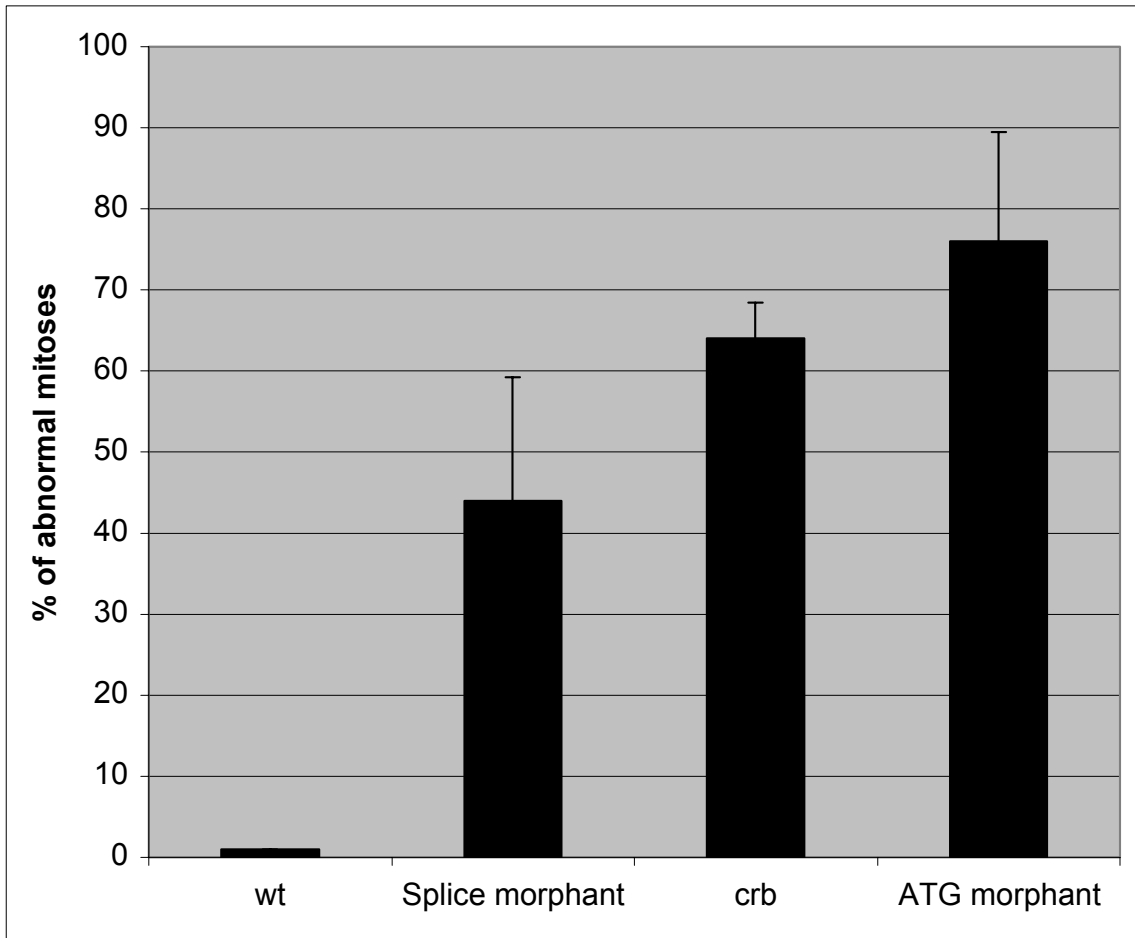

Supplement: pnas_0506583102_3.pdf [file pnas_0506583102_3.pdf]

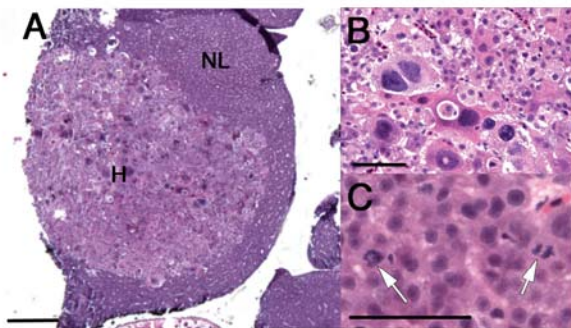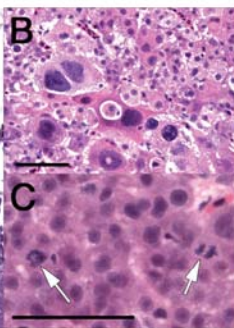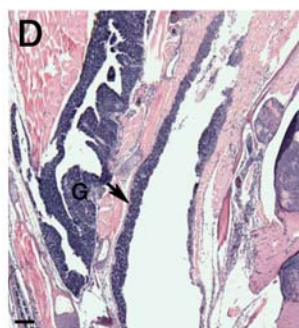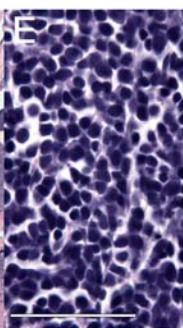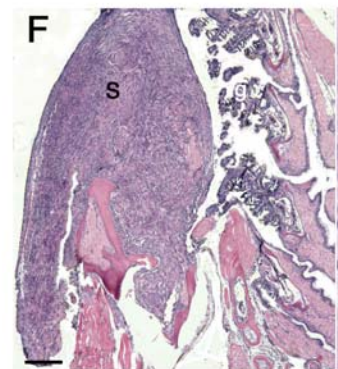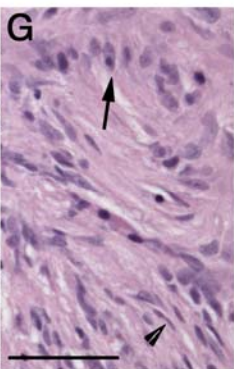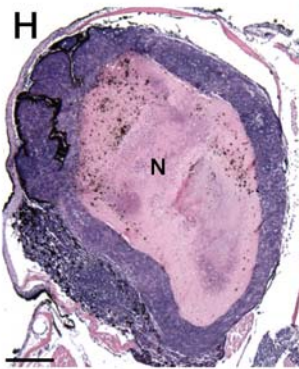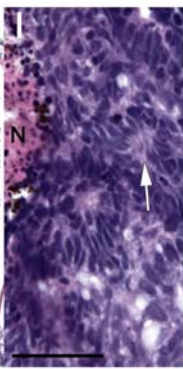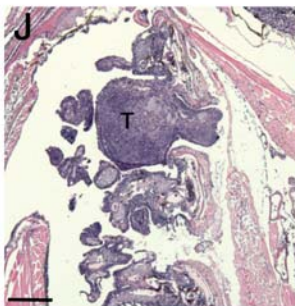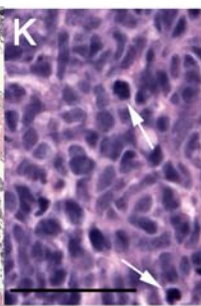

Supplement: pnas_0506583102_4.pdf [file pnas_0506583102_4.pdf]

**A**

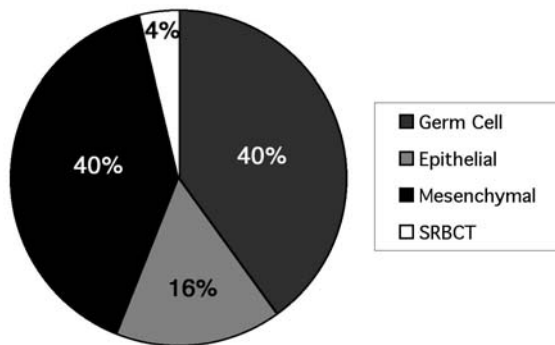

**B**

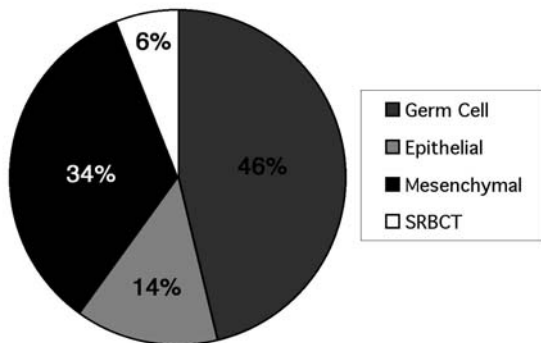

Supplement: pnas_0506583102_5.pdf [file pnas_0506583102_5.pdf]
